# Supplementary material for: Unsupervised identification of disease states from high‐dimensional physiological and histopathological profiles
Source: PubMed Central journal article supplement (PMC6380462; doi:10.15252/msb.20188636), 2019-02-19
Supplement: MSB-15-e8636-s001.pdf [file MSB-15-e8636-s001.pdf]

# APPENDIX.

**Title: Unsupervised identification of disease states from high dimensional physiological and histopathological profiles**

**Running title:** Machine identification of disease states

**Authors:** Kenichi Shimada<sup>1,\*</sup>, Timothy J. Mitchison<sup>1</sup>

## **Table of contents:**

Appendix Figure S1 – Page 1

Appendix Figure S2 – Page 2 - 4

Appendix Figure S3 – Page 5 - 8

Appendix Figure S4 – Page 9

Appendix Figure S5 – Page 10

Appendix Figure S6 – Page 11

Appendix Figure S7 – Page 12



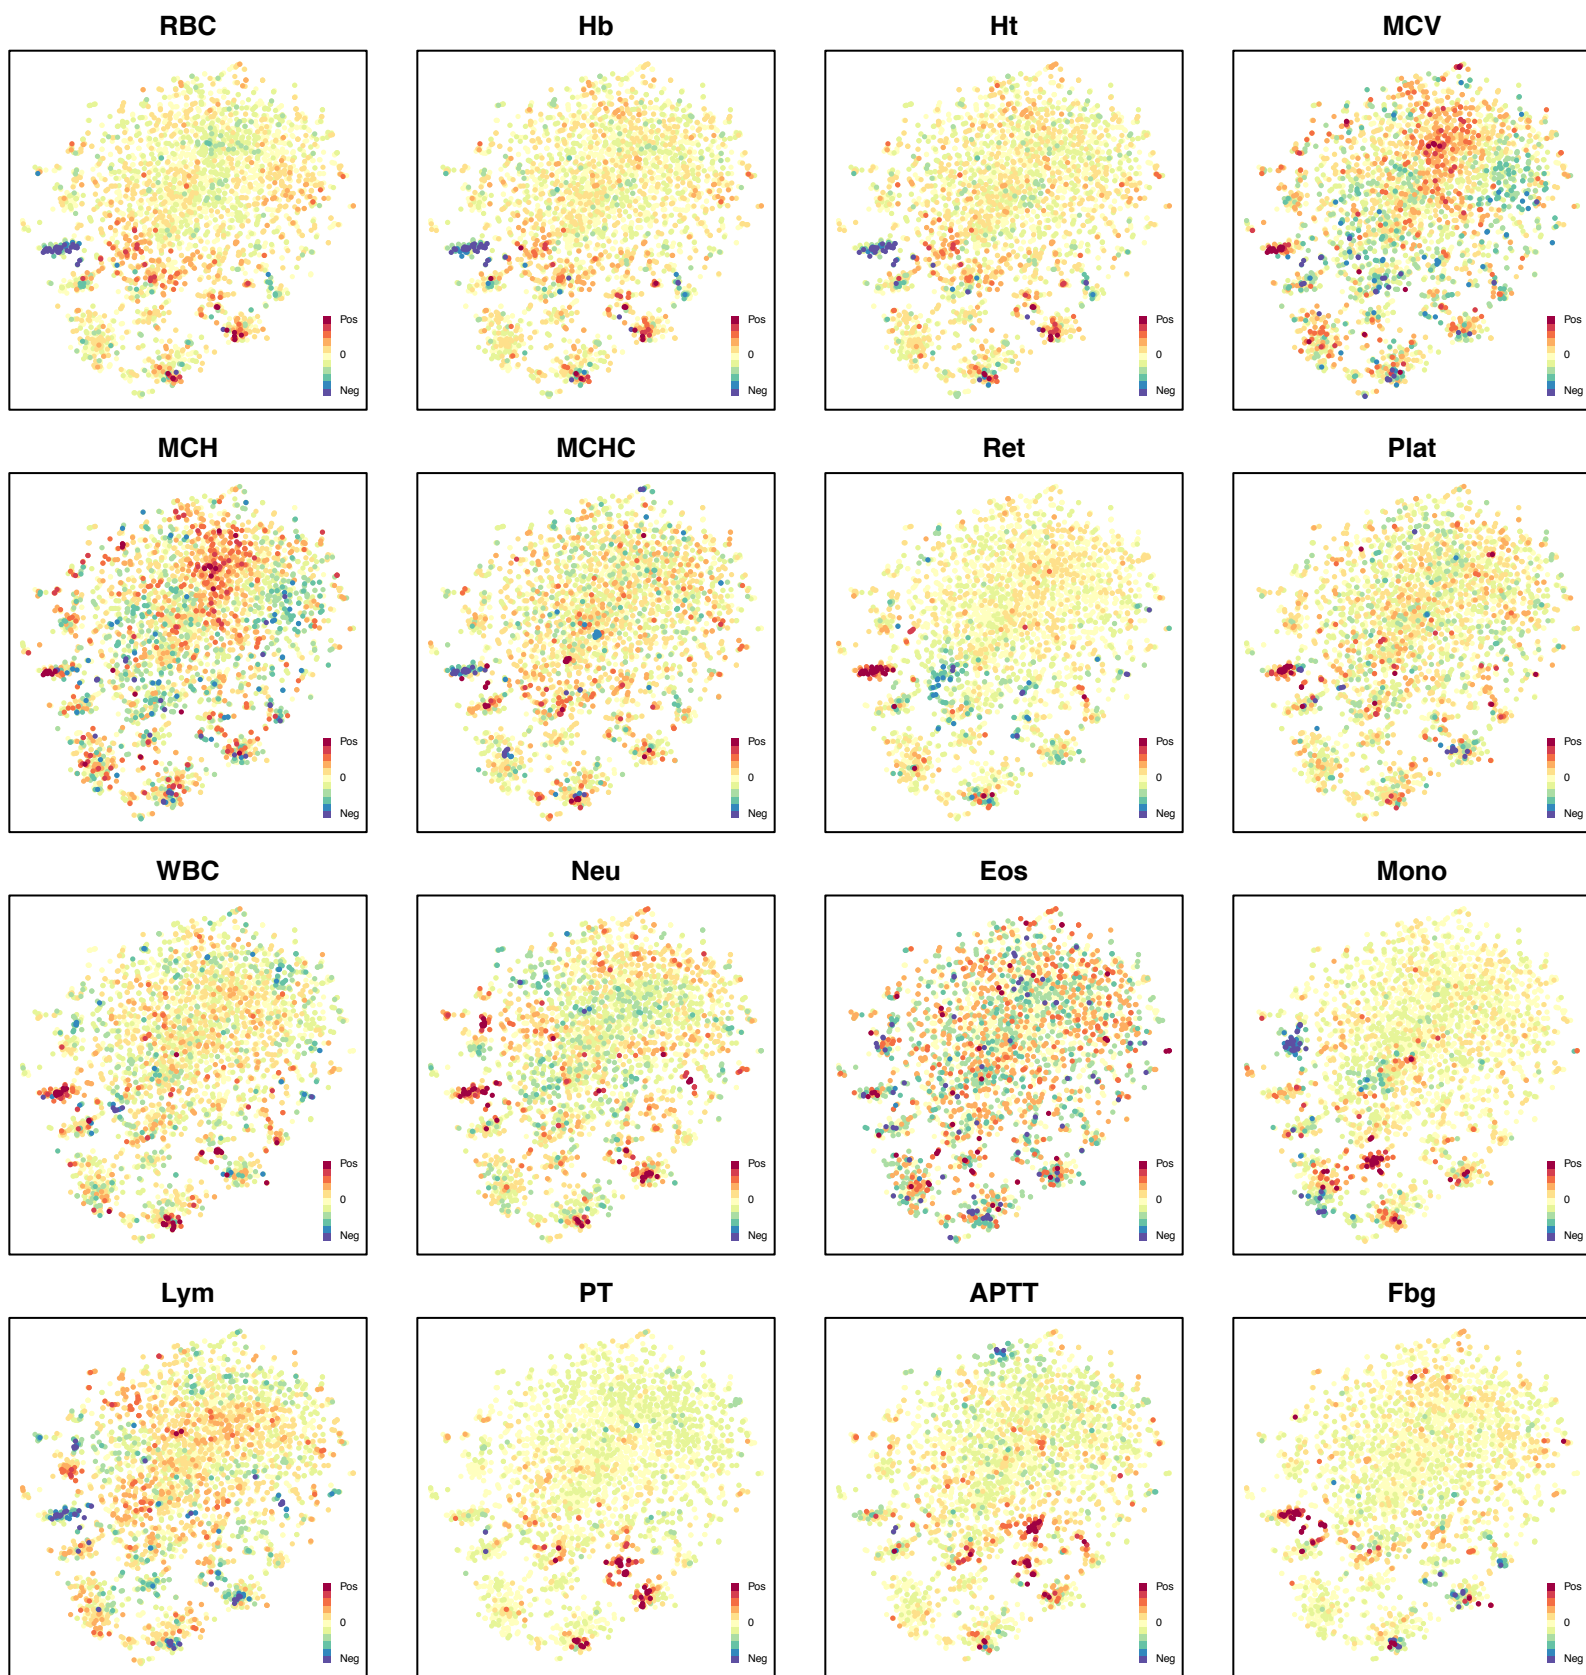

**Appendix Figure S2. Physiology parameters on t-SNE map (1/3 page)**

46 physiology parameters, as well as time point and relative doses (Low, Middle, High) of the measurements were mapped onto the physiology t-SNE map.

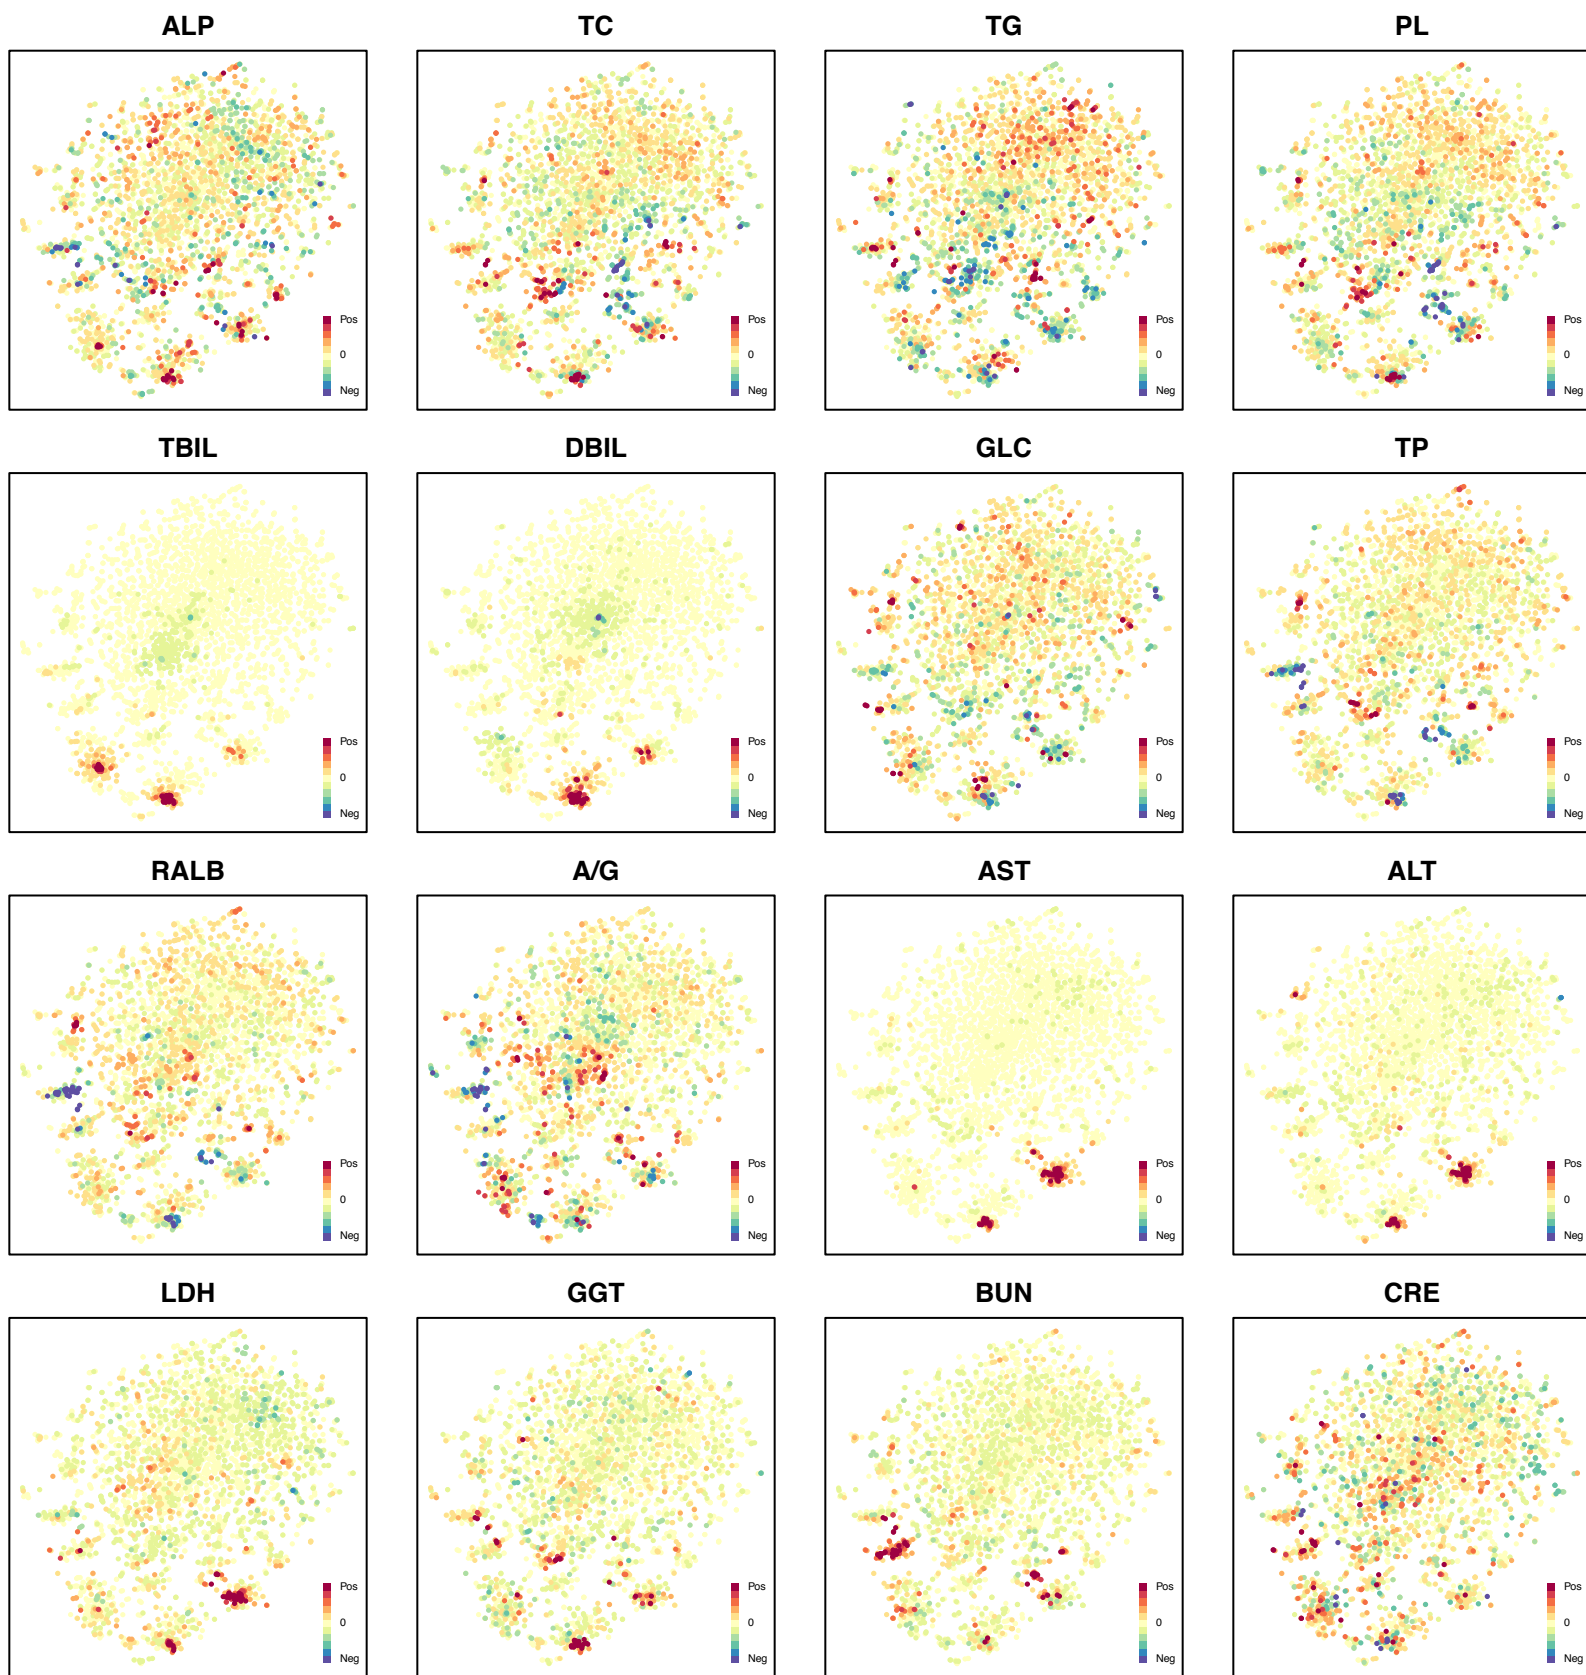

**Appendix Figure S2. Physiology parameters on t-SNE map (continued, 2/3 page)**

46 physiology parameters, as well as time point and relative doses (Low, Middle, High) of the measurements were mapped onto the physiology t-SNE map.



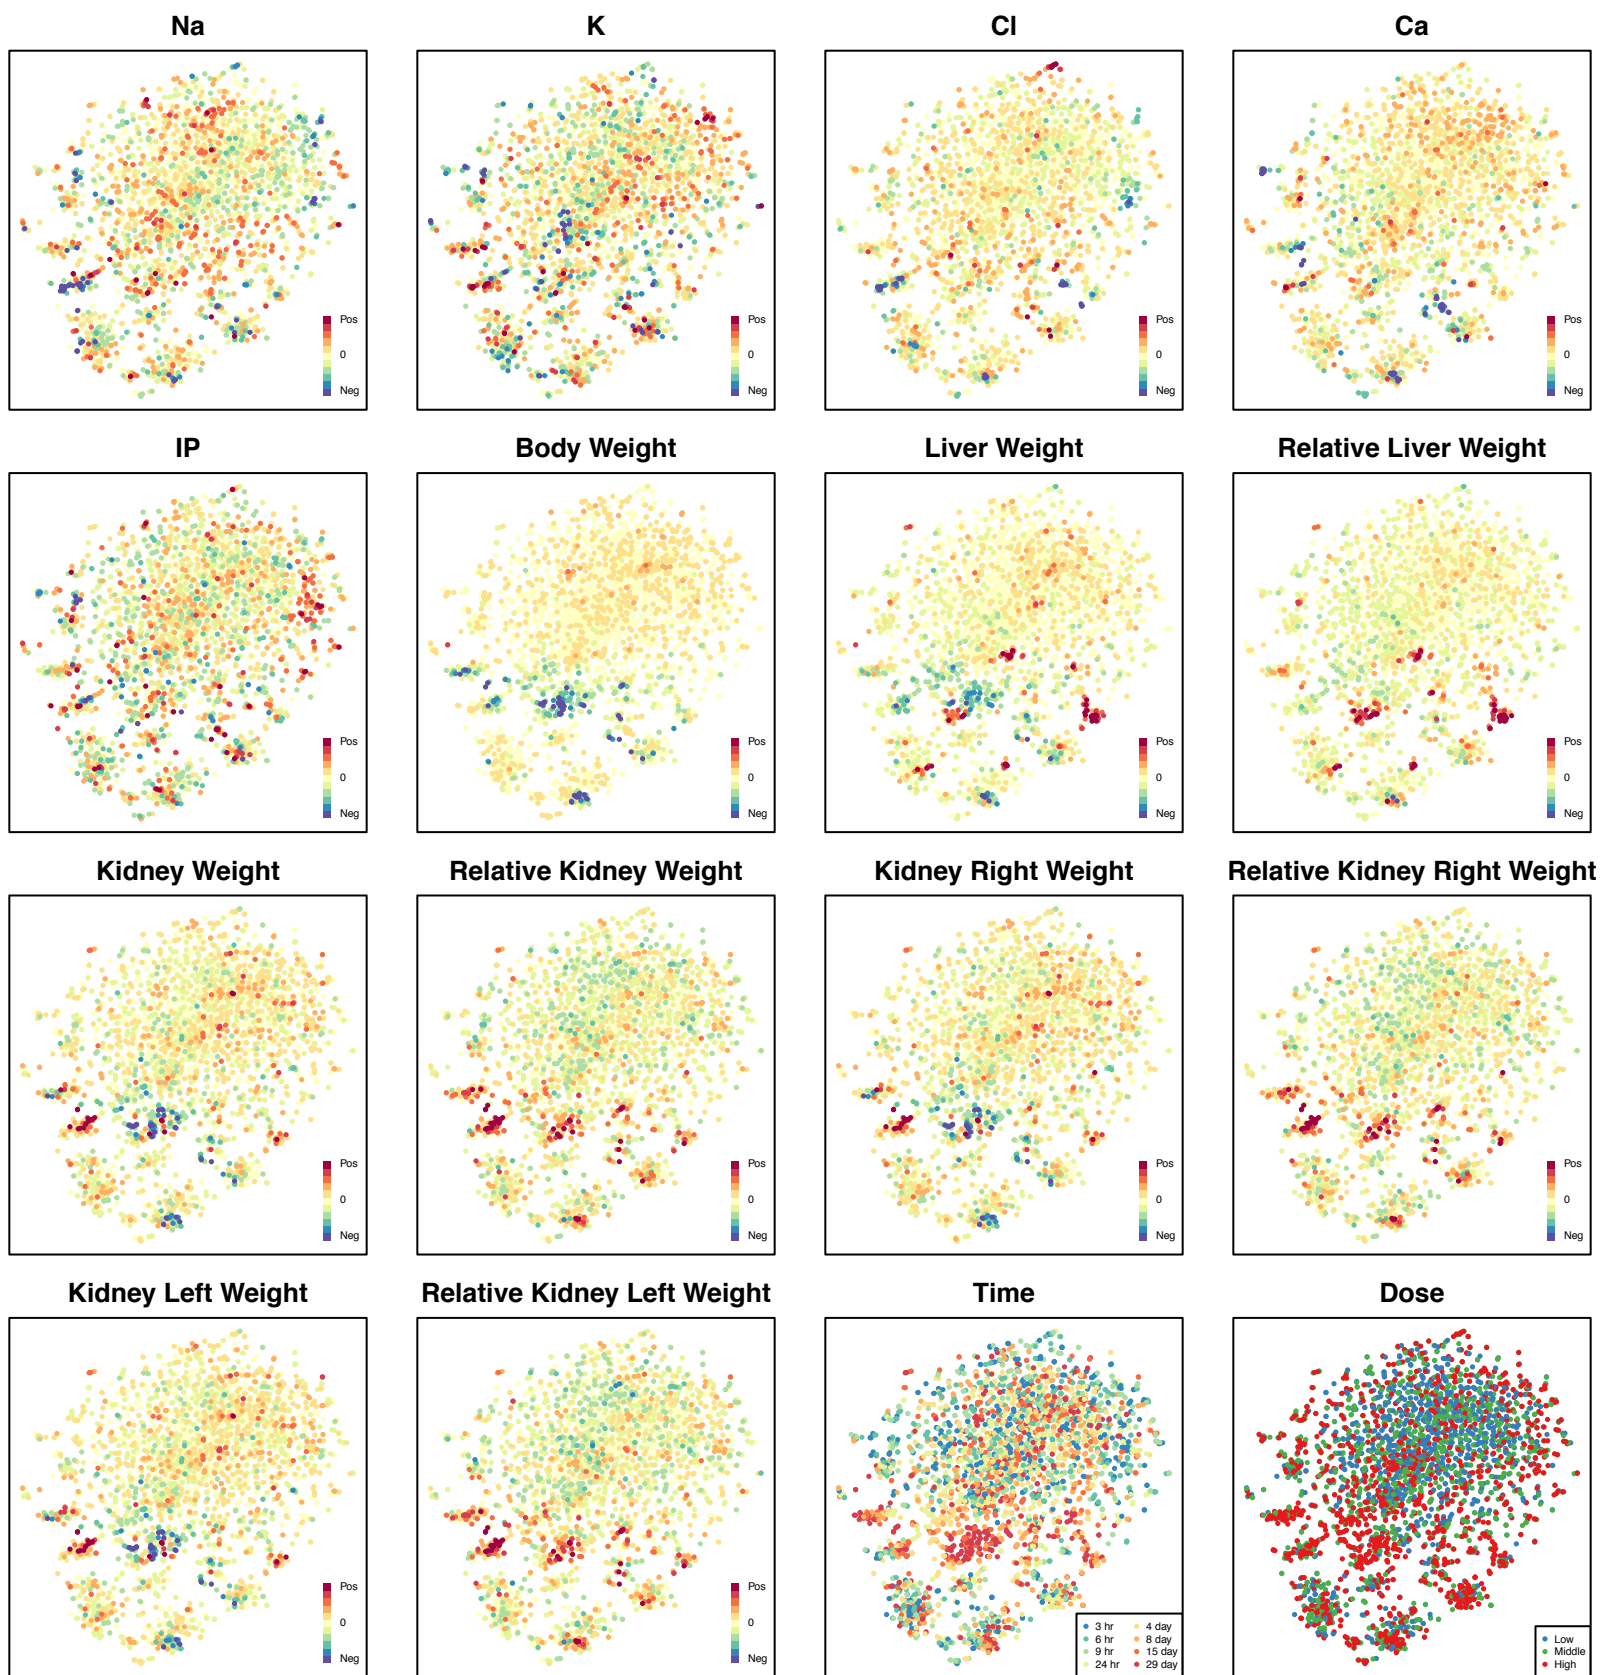

**Appendix Figure S2. Physiology parameters on t-SNE map (continued, 3/3 page)**

46 physiology parameters, as well as time point and relative doses (Low, Middle, High) of the measurements were mapped onto the physiology t-SNE map.

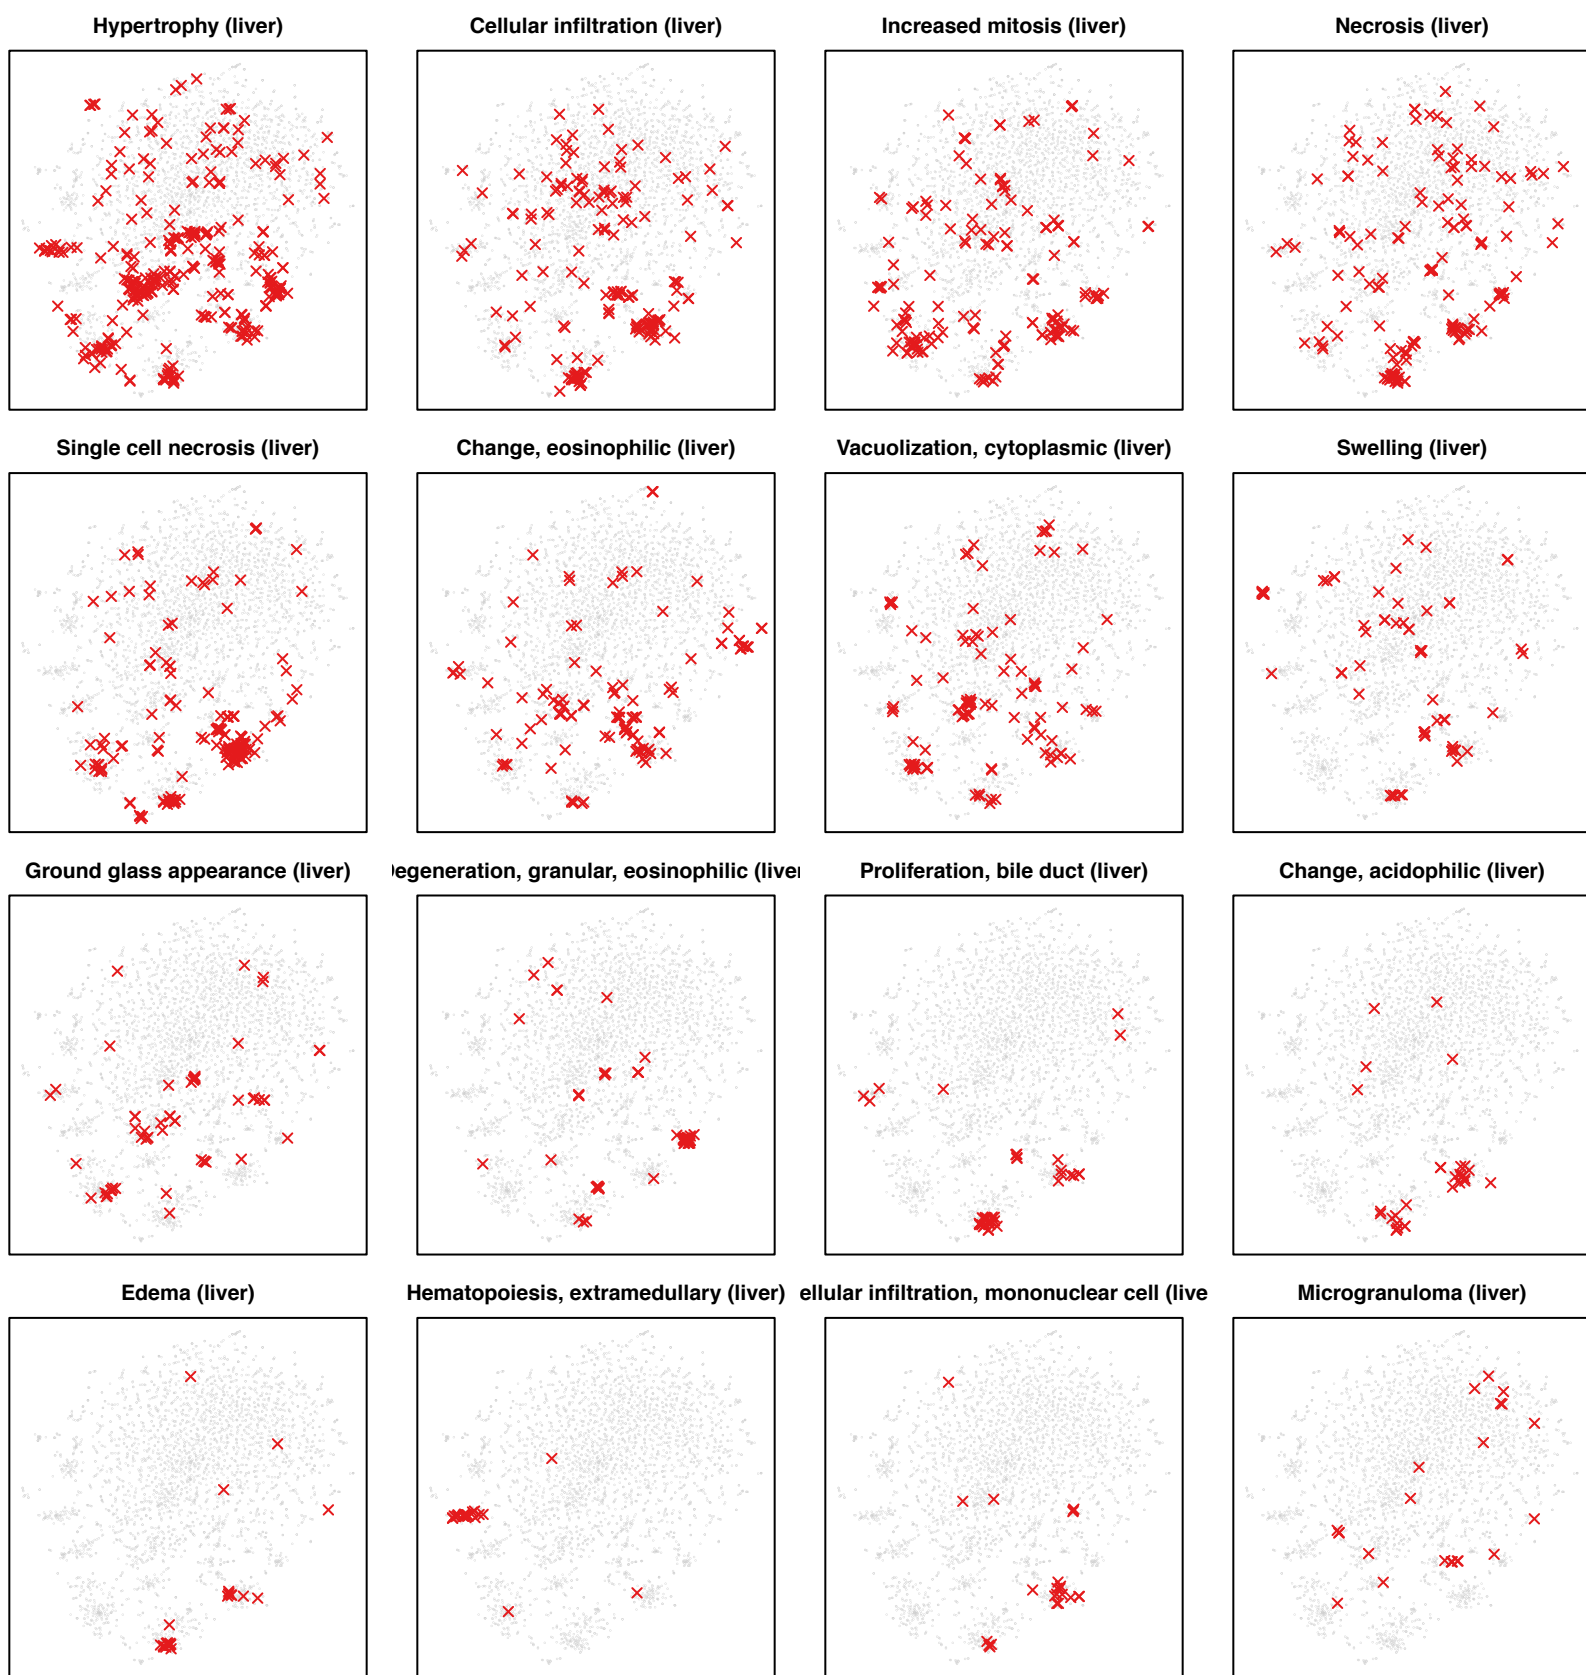

**Appendix Figure S3. Histopathology mapped onto the physiology t-SNE (1/4 page)**

Observations of each histopathology phenotypes in the liver (red) and kidney (blue) were mapped onto the physiology t-SNE plot.

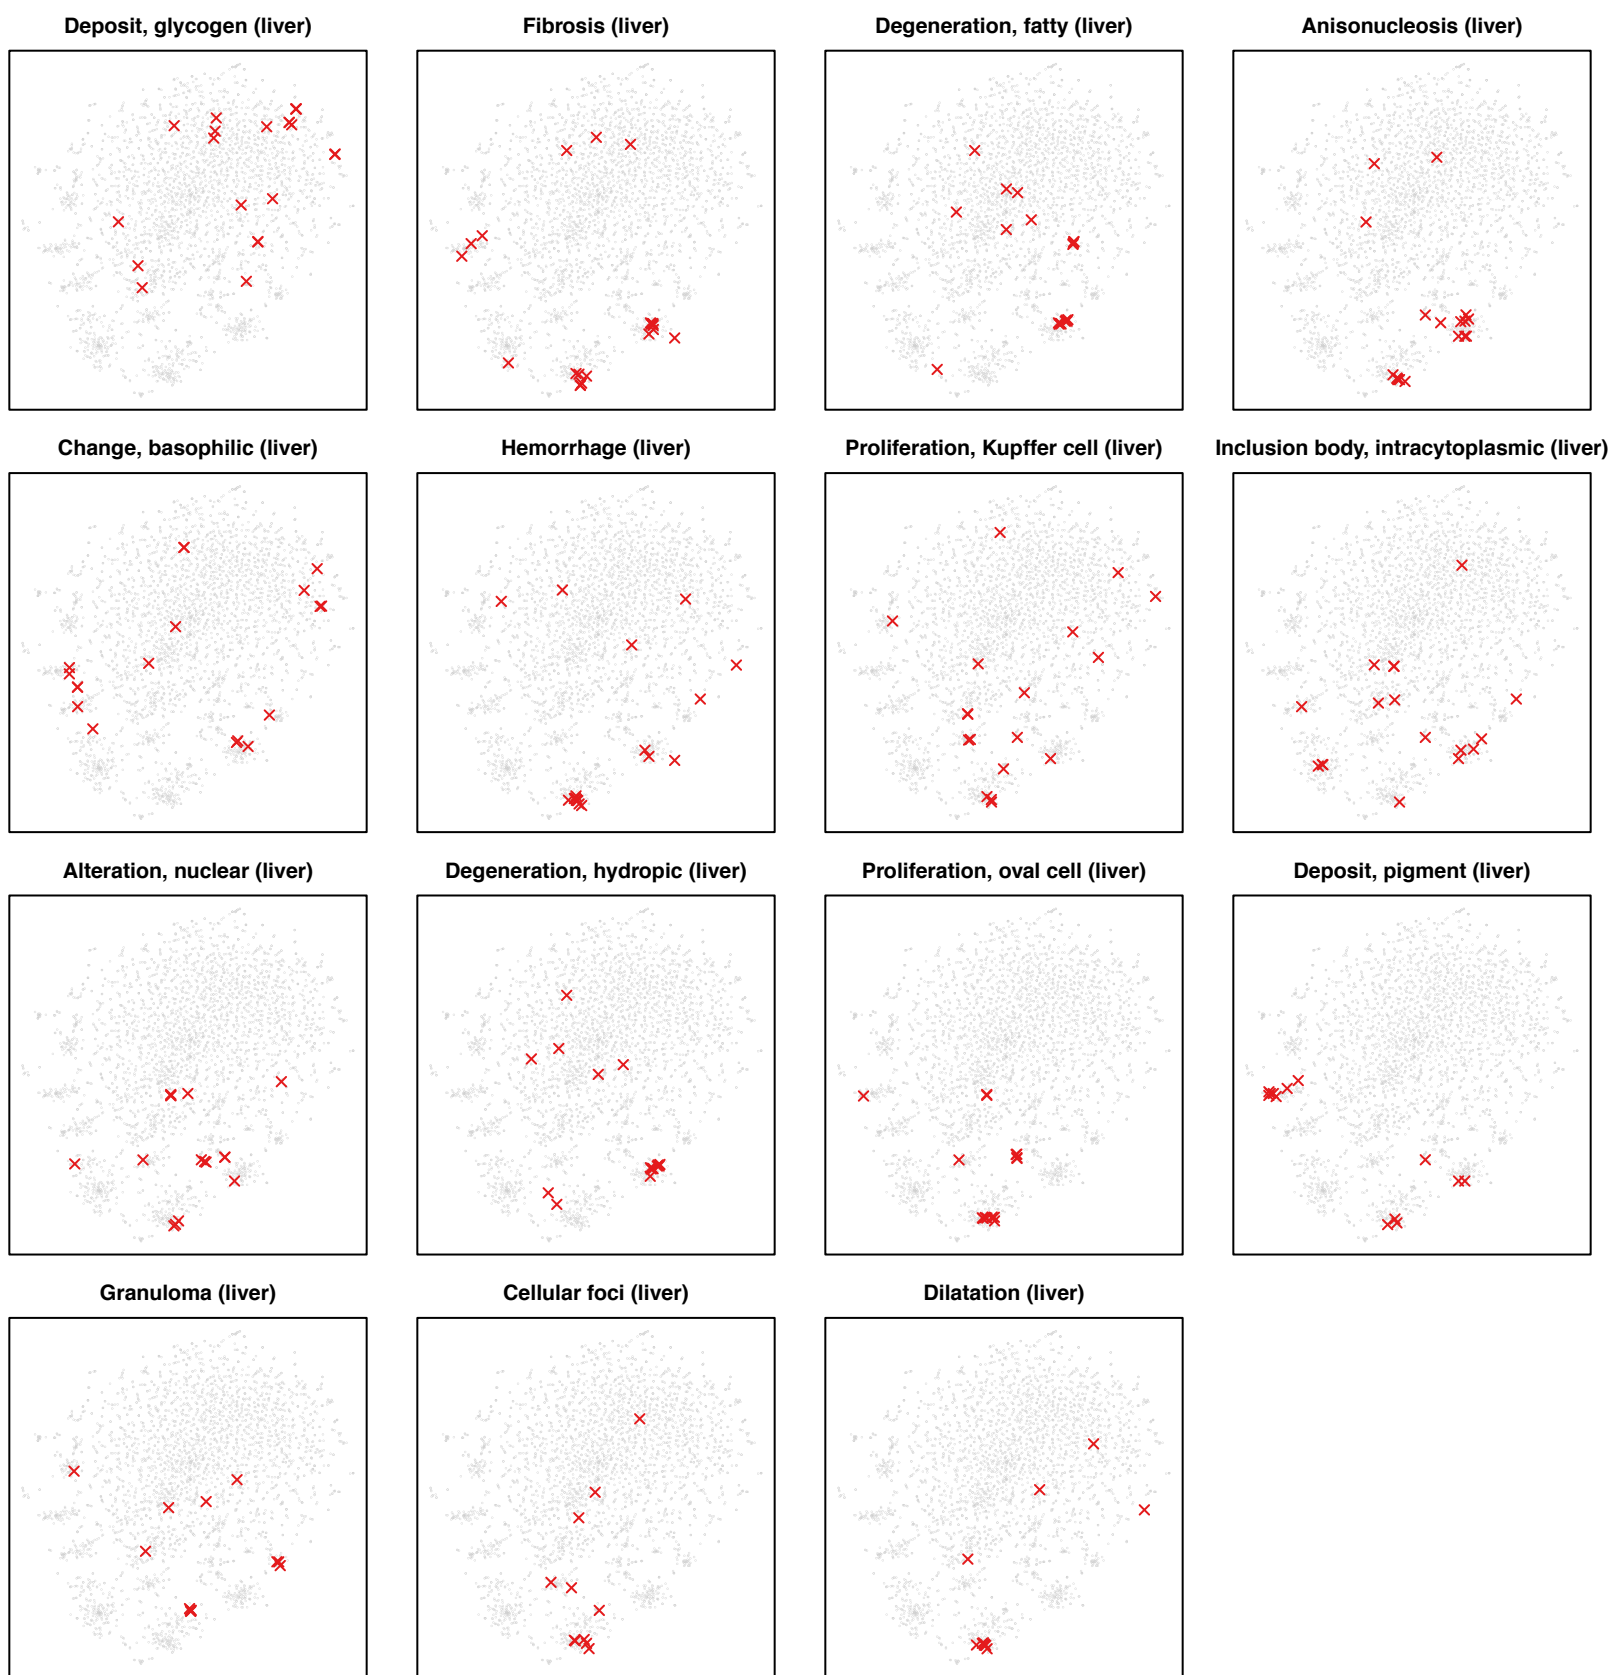

**Appendix Figure S3. Histopathology mapped onto the physiology t-SNE (cont'd, 2/4 page)**  
 Observations of each histopathology phenotypes in the liver (red) and kidney (blue) were mapped onto the physiology t-SNE plot.

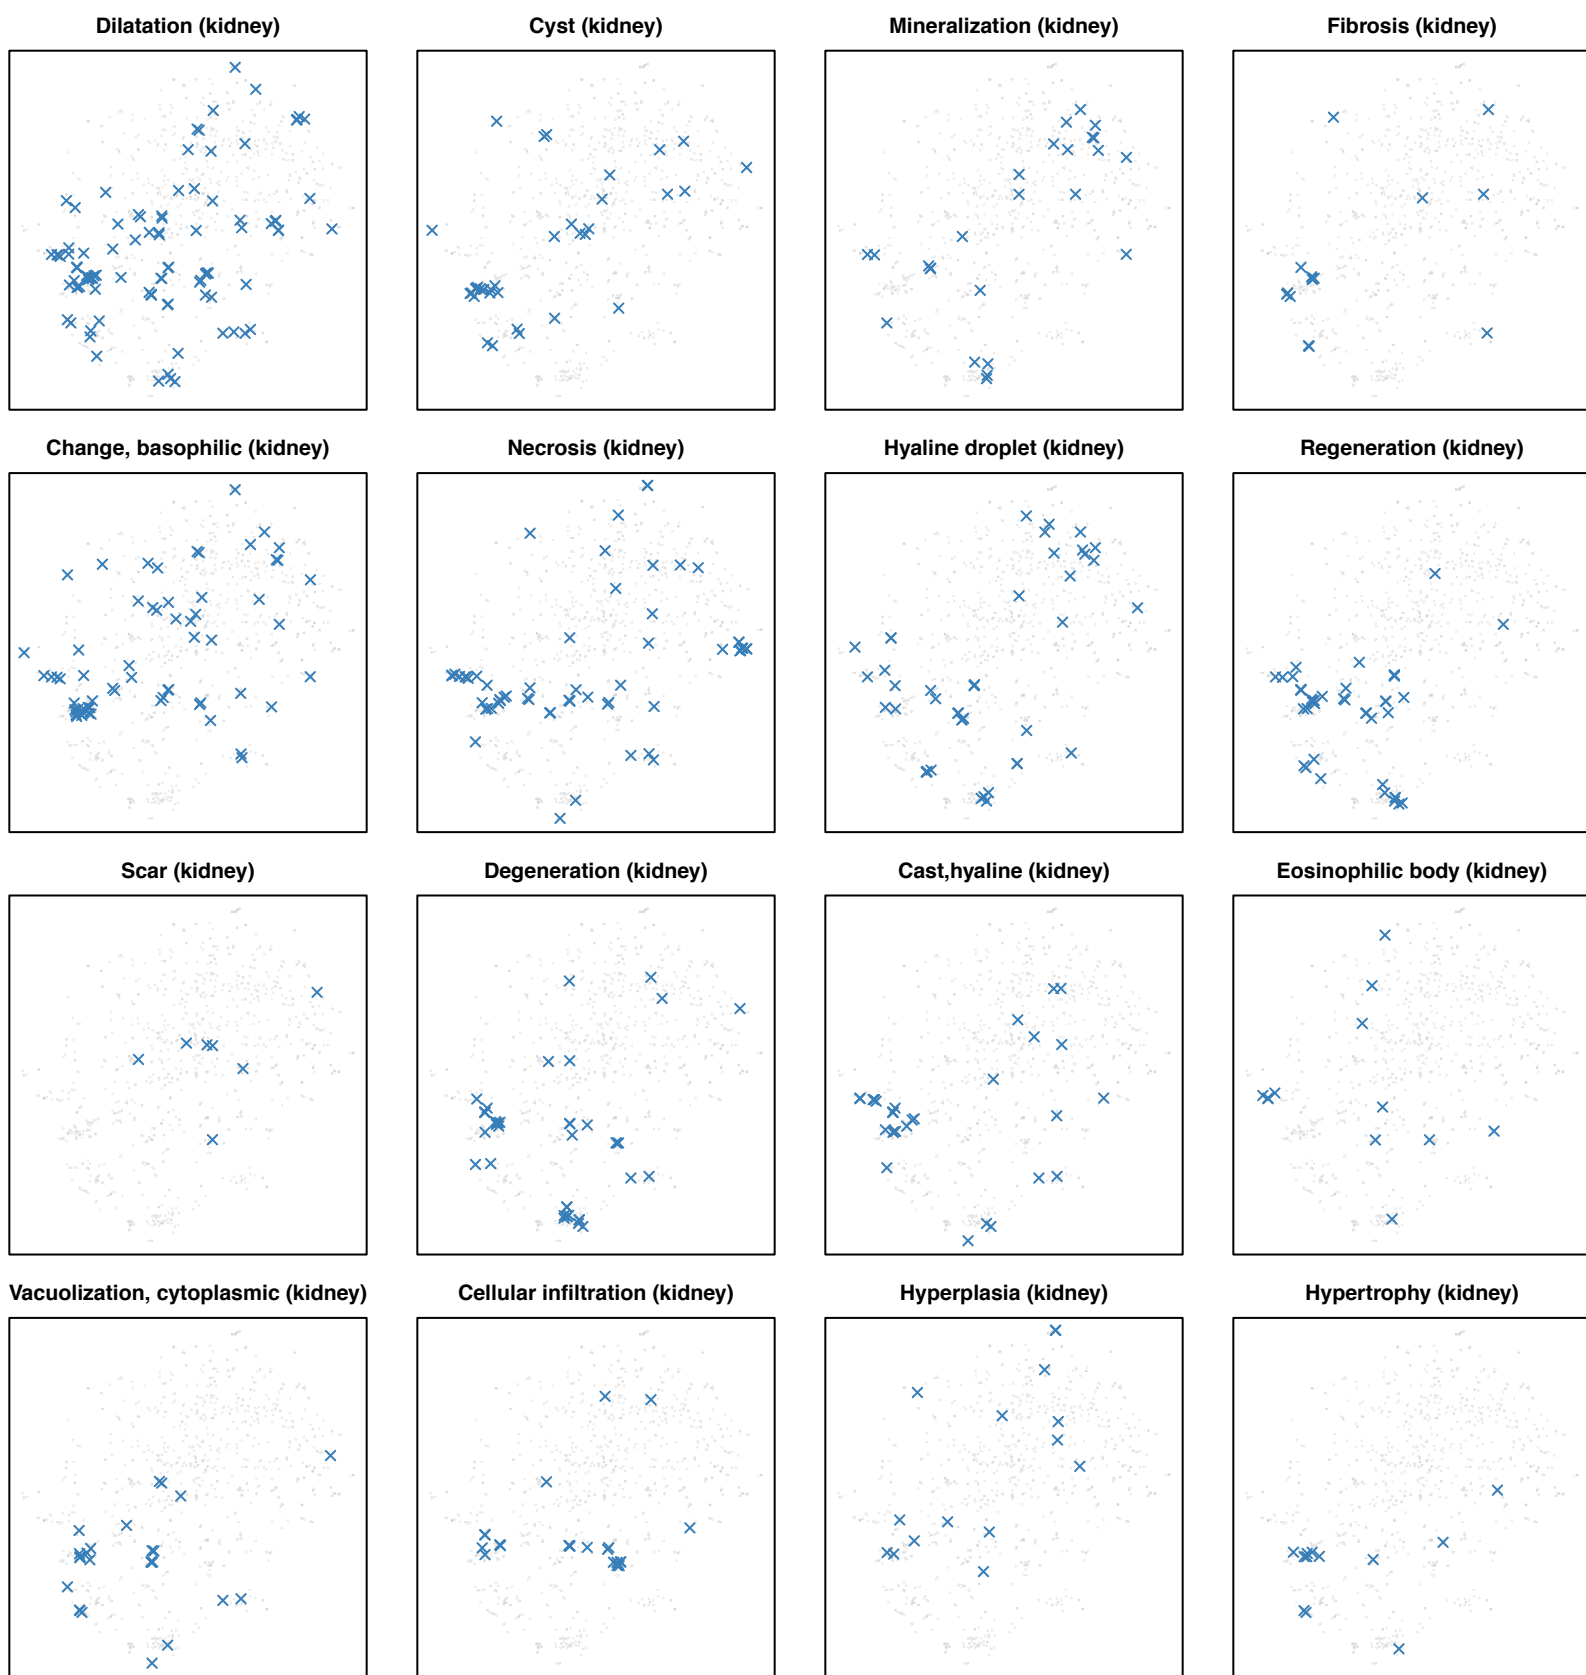

**Appendix Figure S3. Histopathology mapped onto the physiology t-SNE (cont'd, 3/4 page)**

Observations of each histopathology phenotypes in the liver (red) and kidney (blue) were mapped onto the physiology t-SNE plot.

**Cellular infiltration, neutrophil (kidney)**

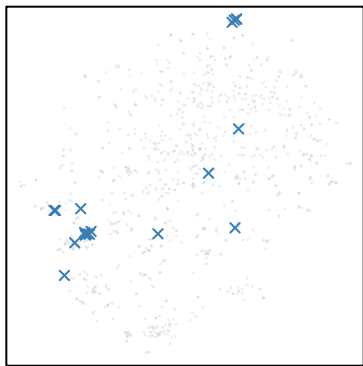

**Edema (kidney)**

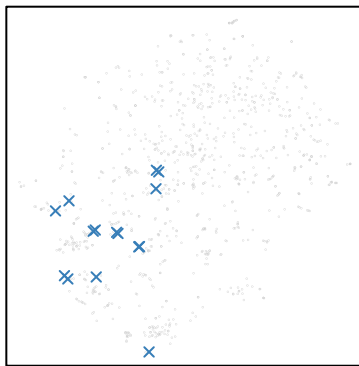

**Infarct (kidney)**

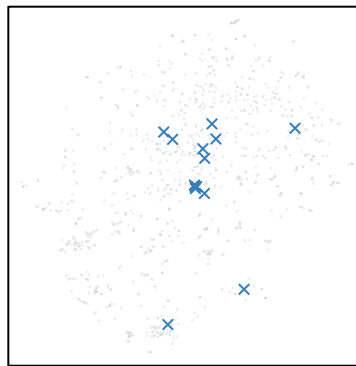

**Swelling (kidney)**

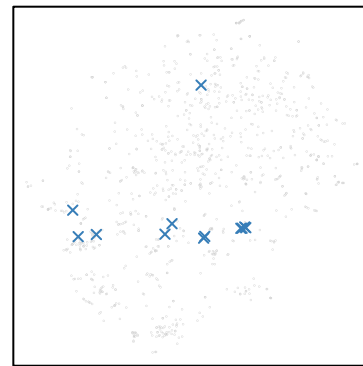

**Dilatation, cystic (kidney)**

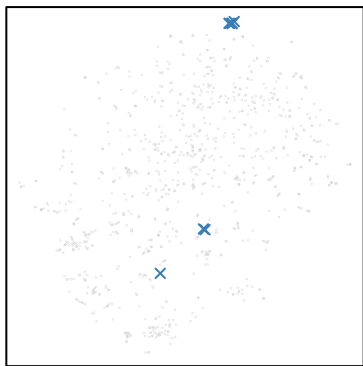

**Appendix Figure S3. Histopathology mapped onto the physiology t-SNE (cont'd, 4/4 page)**

Observations of each histopathology phenotypes in the liver (red) and kidney (blue) were mapped onto the physiology t-SNE plot.



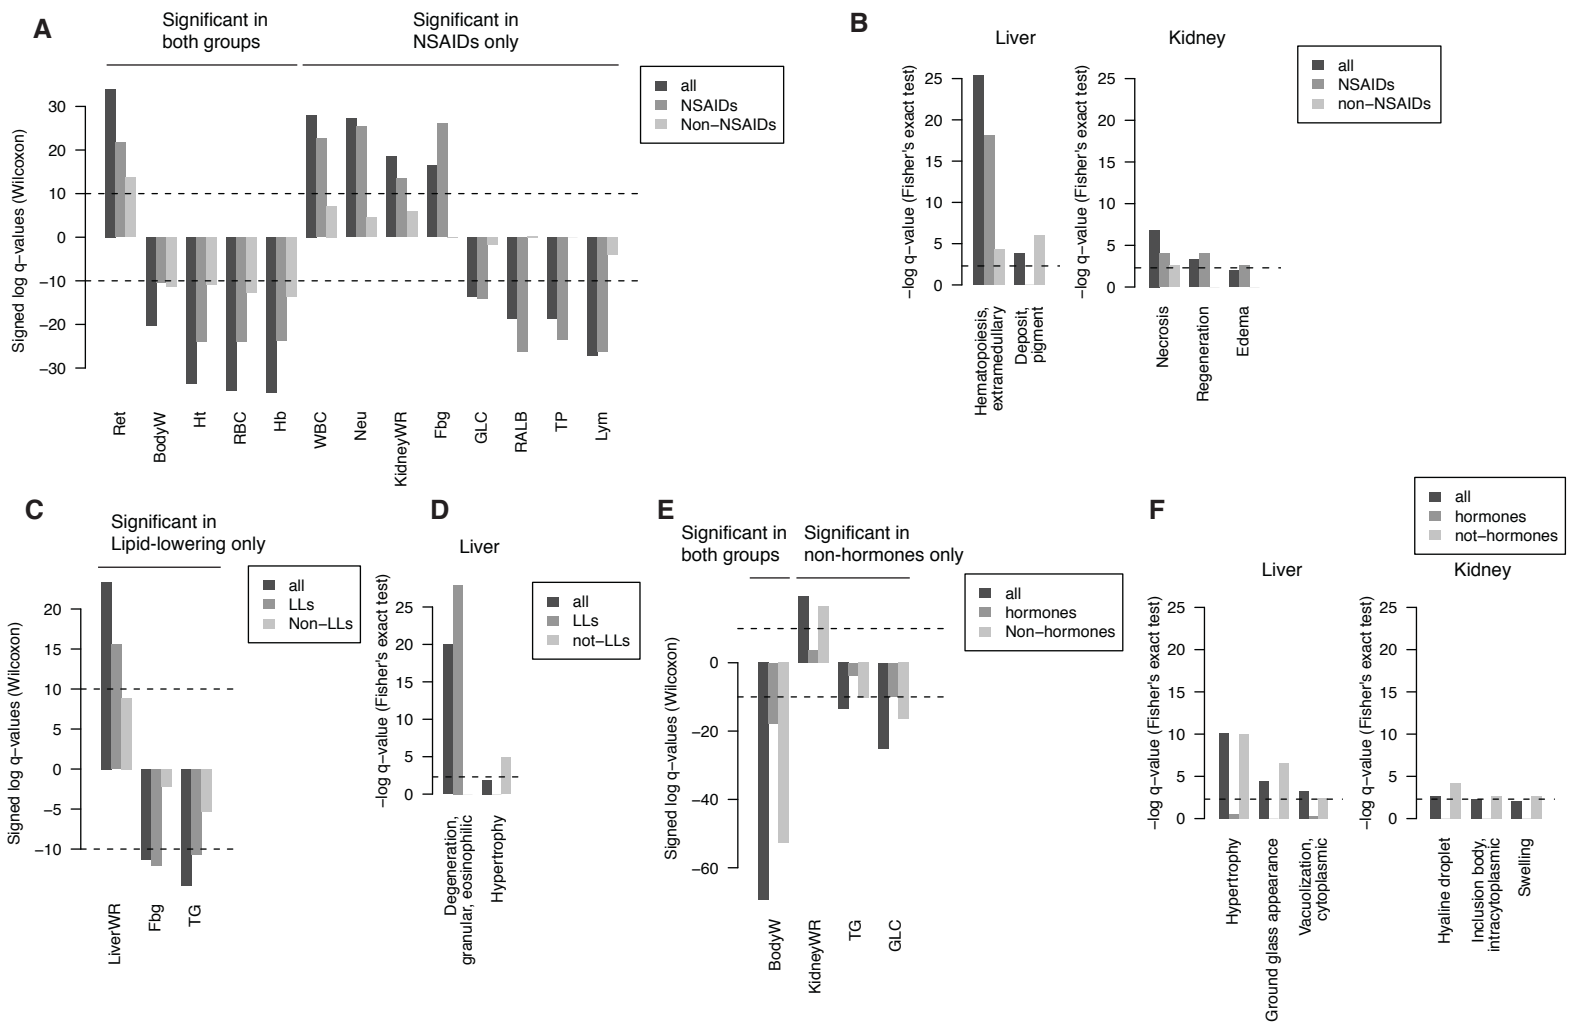

### Appendix Figure S4. Toxin class overrepresentations in DS

**A** Changes in physiological parameters among DS8 that are NSAIDs and not.

**B** Overrepresented histopathological phenotypes among DS8 that are NSAIDs and not.

**C** Changes in physiological parameters among DS1 that are lipid-lowering compounds (LLs) or not.

**D** Overrepresented histopathological phenotypes among DS1 that are LLs or not.

**E** Physiological changes of hormone and non-hormone DS2.

**F** Histopathological overrepresentation of hormone or non-hormone DS2.

For **A-F**, Thresholds for FDR-adjusted p-values (q-values) to call significant were set as  $1 \times 10^{-10}$  for physiology and  $5 \times 10^{-3}$  for histology.

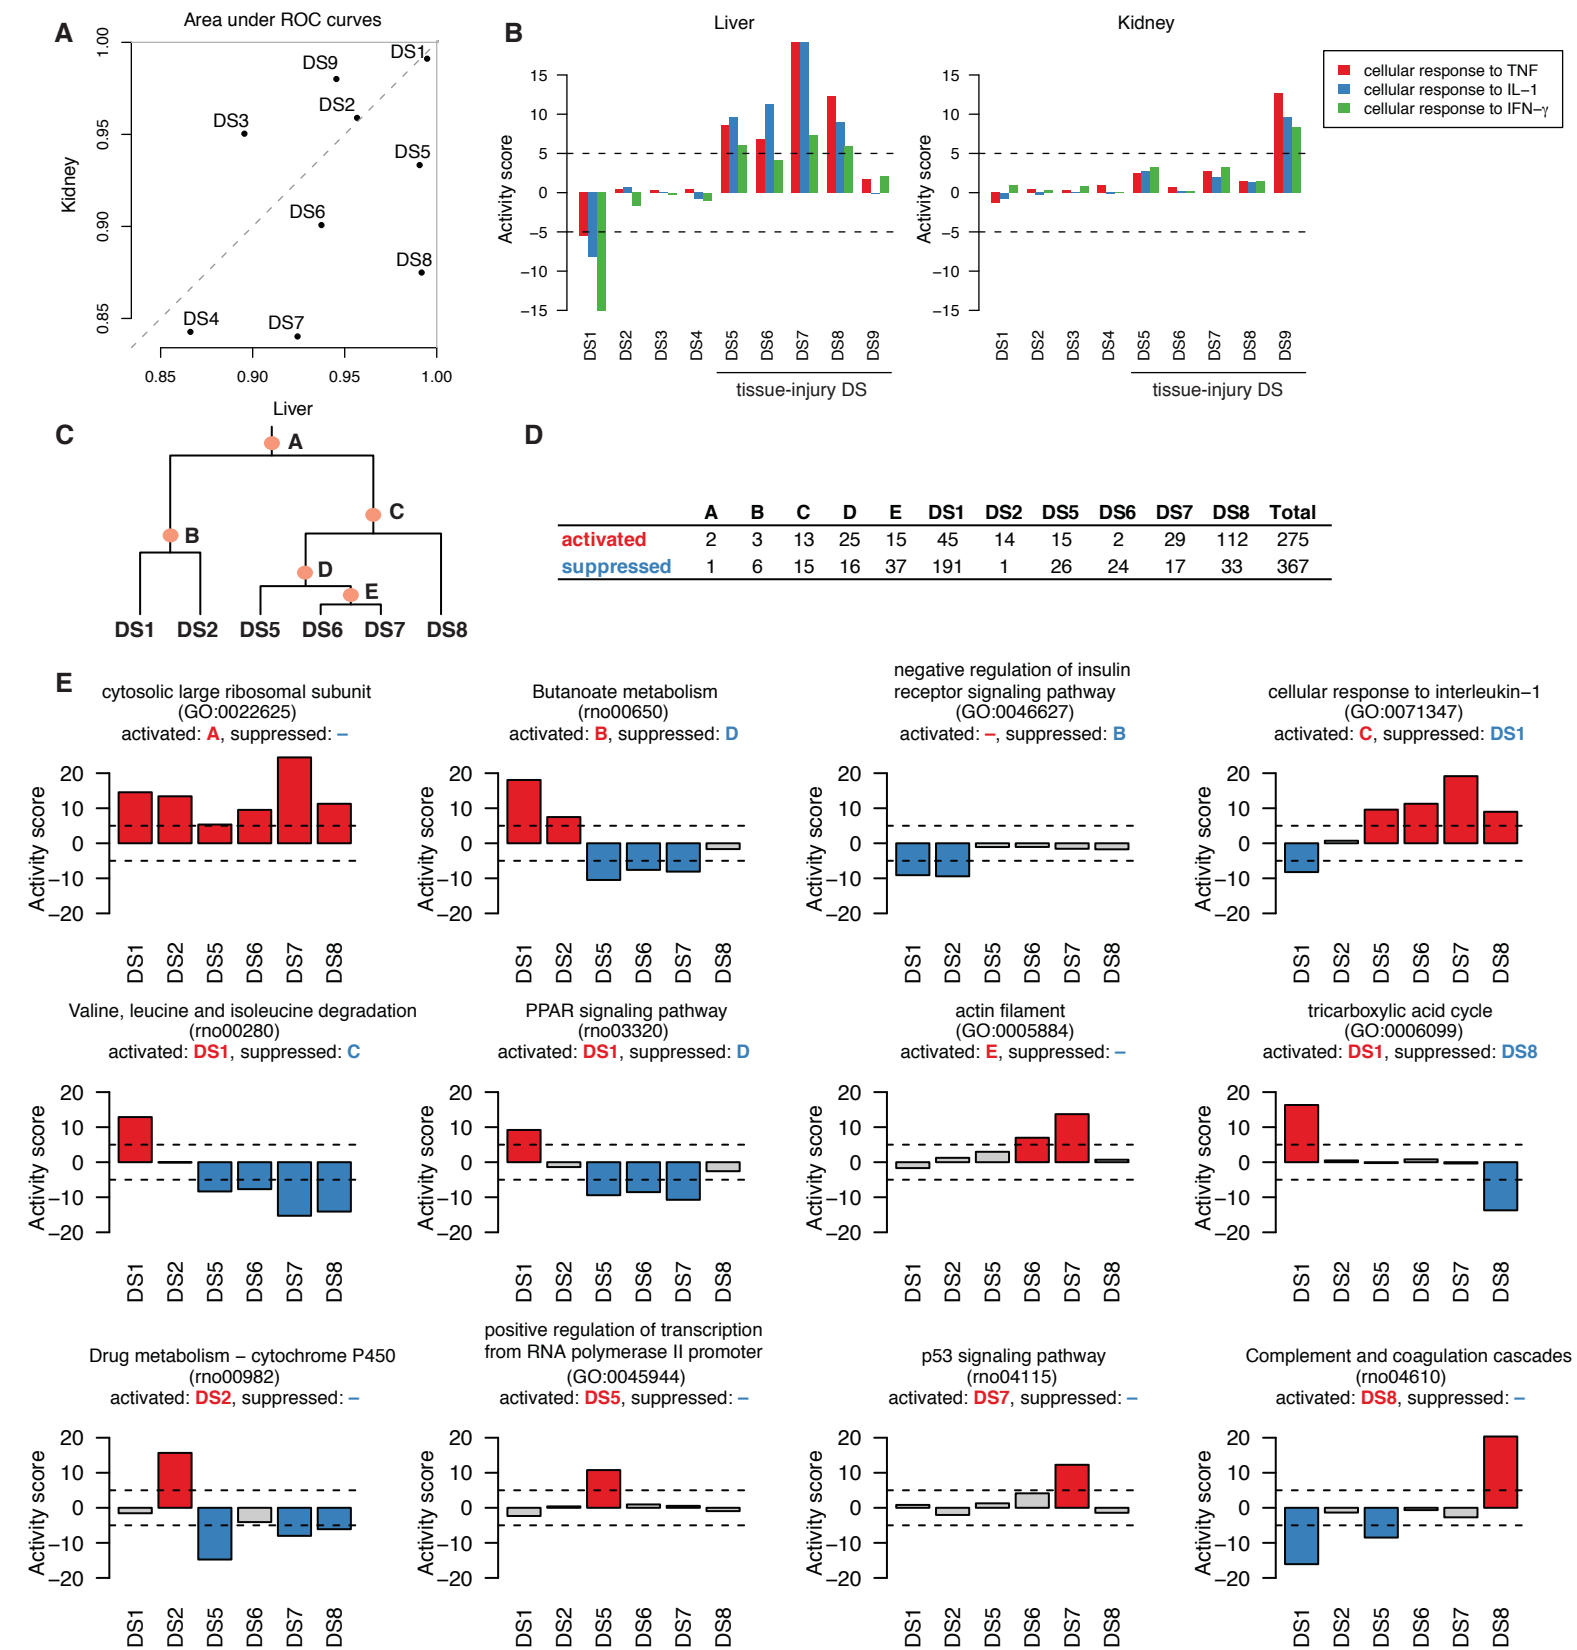

## Appendix Figure S5. Transcriptomic characterization of DS

**A** Area under ROC curves from elastic net classifiers for each DS using either liver or kidney transcriptome data.

**B** Transcriptional activity of GO terms ‘cellular responses to individual proinflammatory cytokines (TNF, IFN- $\gamma$ , IL-1)’ against each DS.

**C** Dendrogram of the six DSs which showed substantial liver transcriptome changes. Nodes A-E corresponds to multiple DSs.

**D** Number of activated and suppressed pathways in each node (individual DS or multiple DSs).

**E** Examples of 12 pathways and the corresponding nodes in which they were activated or suppressed. In some cases, such as suppression of rno00982 or rno04610, pathways were not assigned to any nodes because the pattern of activation/suppression did not uniquely match to any nodes.

### A DS retention

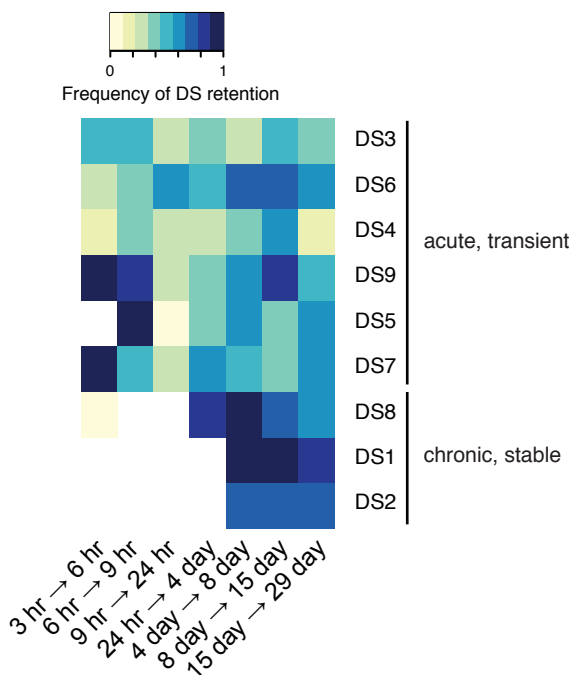

### B # unique DS per condition

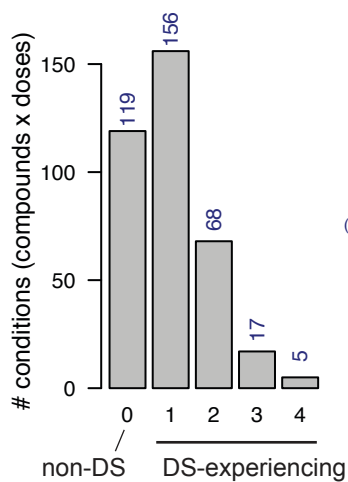

### C DS transition centering DS2

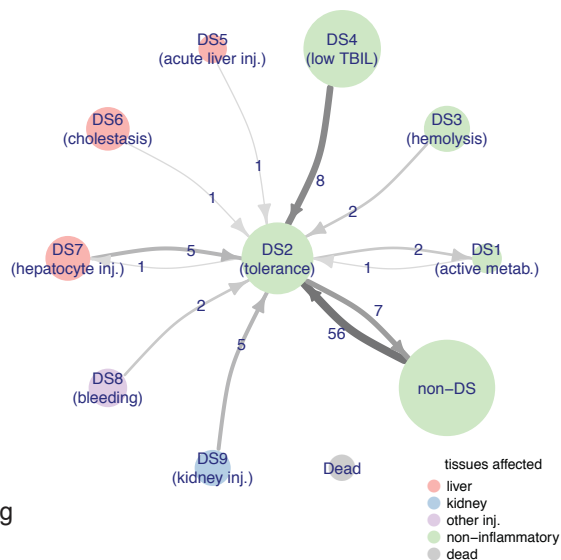

## Appendix Figure S6. Disease state dynamics

**A** DS retention. A heatmap showing the ratio of conditions which retain the same DSs between two consecutive time points.

**B** The number of unique DSs caused by one condition is summarized.

**C** Same as DS transition graph in Fig. 4B except that this one highlights changes to and from DS2 only.

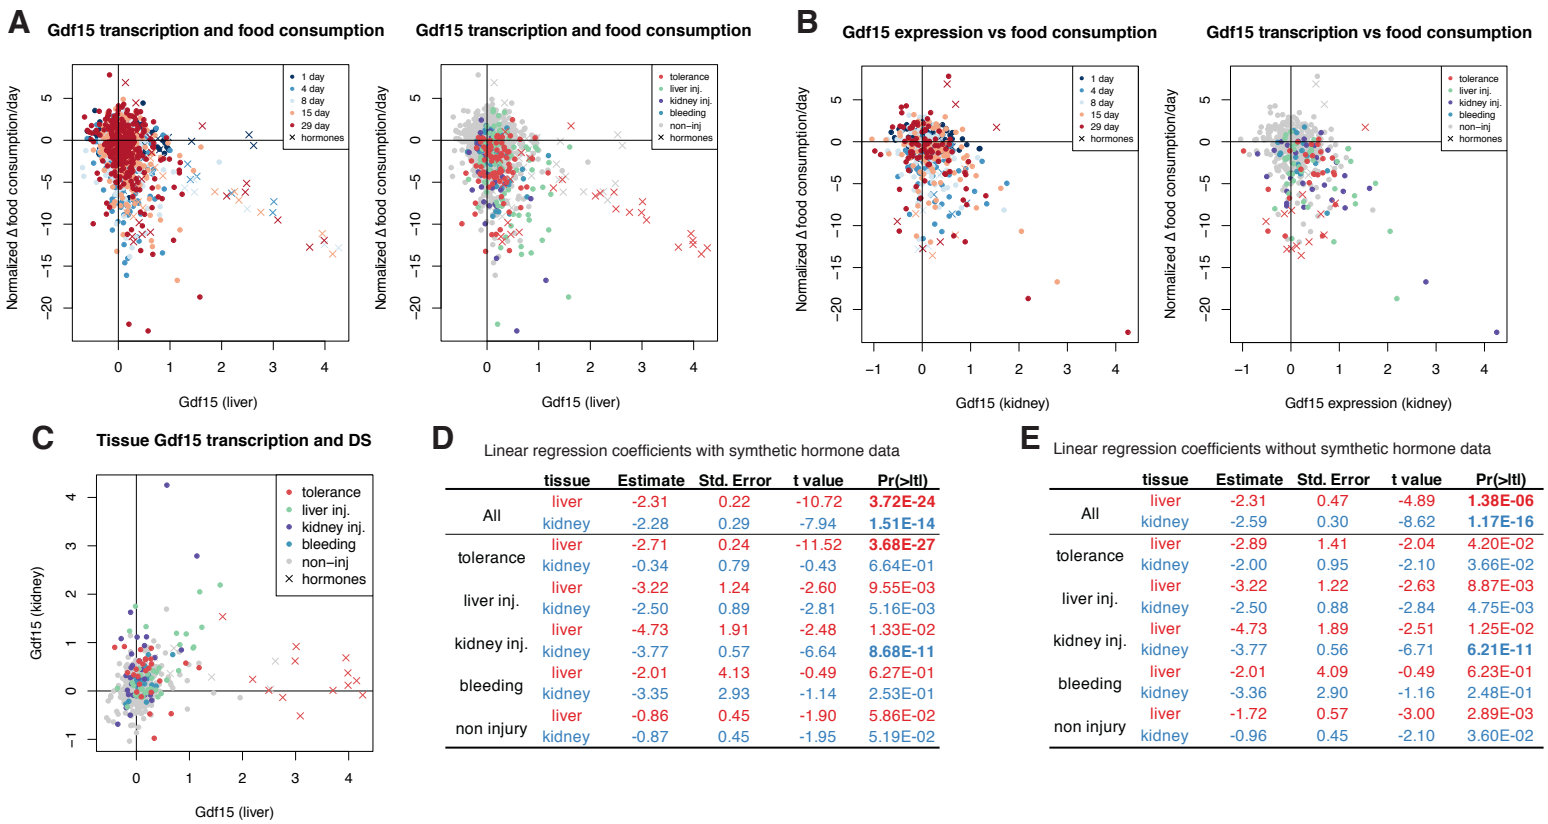

## Appendix Figure S7. Relationship between Gdf15 transcription and food consumption

**A-B** Liver (**A**) or kidney (**B**) expression of Gdf15 and food consumption was plotted. Points were color coded by time points (left) and disease states (right). Conditions treated with synthetic hormones were marked by x (otherwise filled circles).

**C** Gdf15's expression in liver and kidney are plotted. Points are color coded by disease states. Synthetic hormones are marked by x.

**D-E** Summary of multivariate linear regression of food consumption on liver and kidney Gdf15 expressions. Regression was computed using data including synthetic hormone treatments (**D**), or excluding them (**E**). In both, p-values lower than  $10^{-5}$  were highlighted in bold letters.
